# Supplementary material
Source: MDPI journal article supplement (https://www.mdpi.com/2071-1050/12/4/1586)
Supplement: s1 [file s1]

## Supplementary Material

### Life Cycle Assessment of Dietary Patterns in the United States: A Full Food Supply Chain Perspective

Daesoo Kim <sup>1</sup>, Ranjan Parajuli <sup>1</sup> and Gregory J. Thoma <sup>1,\*</sup>

<sup>1</sup> Ralph E. Martin Department of Chemical Engineering, University of Arkansas, Fayetteville, AR 72701, USA; [dkim@uark.edu](mailto:dkim@uark.edu); [rparajul@uark.edu](mailto:rparajul@uark.edu); [gthoma@uark.edu](mailto:gthoma@uark.edu)

\* Correspondence: [gthoma@uark.edu](mailto:gthoma@uark.edu); Tel.: +1-479-575-4951

#### Contents

**Table S1.** EIO-LCA commodity sector mapping for each food group.

**Table S2.** Expenditure in U.S. dollar per household per year and average purchase price per kg of each food group. CEDA price conversion factor is multiplied by the purchase price to obtain producer's price.

**Table S3.** Estimated annual food consumption per household associated with dietary patterns among the U.S. population.

**Section S1.** Calculation of total food loss using USDA ERS loss-adjusted food availability (LAFA) database.

**Table S4.** Percent of food loss at each supply chain using USDA ERS loss-adjusted food availability database.

**Table S5.** The allocation fraction between primary and secondary product (by-product) by NAICS revenue data and USDA ERS data.

**Table S6.** Food group allocation fraction for the estimation of space share of each food group at a typical supermarket and environmental burdens at retail phase and consumer phase.

**Table S7.** Store counts by grocery channels.

**Section S2.** Calculation of retail burdens for the vegetables group at a typical supermarket outlet.

**Table S8.** Allocated burdens in a typical supermarket and allocated burdens per kg displayed across all other food groups.

**Section S3.** Calculation of consumer phase for the vegetables group as an example.

**Table S9.** Energy consumption per kilogram of commodities in the consumer phase across all food groups.

**Table S10.** Electricity consumption of food preparation appliances for each food group per household per year. The allocation was based on the household expenditure data.

**Table S11.** Type of packaging materials used for each food group.

**Table S12.** Food packaging types and estimated amount of packaging materials used for each food group in million tons.

**Table S13.** Relative contribution of the food groups to the environmental impact, e.g. GHGEs under the CFP 2547 kcal and the RFP 2,000 kcal scenarios.

**Table S14.** Relative contribution of each food group to environmental impacts associated with dietary patterns.

**Table S15.** Results of 1,000 Monte Carlo runs for uncertainty analysis associated with dietary patterns.

**Table S1.** EIO-LCA commodity sector mapping for each food group.

| Food Group       | I/O Industry Code | EIO-LCA commodity sector mapping                           | CEDA GHGEs results (kg CO <sub>2</sub> -eq/kg) <sup>a</sup> |
|------------------|-------------------|------------------------------------------------------------|-------------------------------------------------------------|
| Vegetables       | 31142B            | Vegetable canning, pickling, and drying*                   | 1.79                                                        |
| Fruit and Juices | 31142A            | Fruit canning, pickling, and drying*                       | 1.93                                                        |
| Milk and Dairy   | 311513            | Cheese manufacturing                                       | 6.90                                                        |
|                  | 31151A            | Fluid milk and butter manufacturing                        | 1.24                                                        |
|                  | 311514            | Dry, condensed, and evaporated dairy product manufacturing | 8.38                                                        |
|                  | 311520            | Ice cream and frozen dessert manufacturing                 | 1.73                                                        |
| Grains           | 311810            | Bread and bakery product manufacturing                     | 0.93                                                        |
| Red meat         | 31161A            | Animal (beef) slaughtering, rendering, and processing*     | 35.4 <sup>b</sup>                                           |
|                  | 31161B            | Animal (pork) slaughtering, rendering, and processing*     | 8.5 <sup>b</sup>                                            |
|                  | 31161C            | Animal (other) slaughtering, rendering, and processing*    | 26.5 <sup>b</sup>                                           |
| Poultry          | 311615            | Poultry processing                                         | 5.57 <sup>b</sup>                                           |
| Eggs             | 11230B            | Egg production*                                            | 3.26                                                        |
| Fish and Seafood | 311700            | Seafood product preparation and packaging                  | 6.30                                                        |
| Beans and Peas   | 31122A            | Soybean and other oilseed processing                       | 2.79                                                        |
| Nuts and Seeds   | 111335            | Tree nut farming                                           | 2.22                                                        |
| Fats and Oils    | 311225            | Fats and oils refining and blending                        | 1.61                                                        |
| Sweeteners       | 31131A            | Sugar cane mills and refining                              | 1.64                                                        |

\* new, disaggregated sector. <sup>a</sup> cradle-to-retail gate emission factor. <sup>b</sup> boneless meat.

**Table S2.** Expenditure in U.S. dollar per household per year and average purchase price per kg of each food group. CEDA price conversion factor is multiplied by the purchase price to obtain producer's price.

| Food Group       | Expenditure in U.S. dollars per household [1] | Purchase price per kg | CEDA price conversion factor |
|------------------|-----------------------------------------------|-----------------------|------------------------------|
| Vegetables       | \$ 541                                        | \$ 1.71               | 0.870729                     |
| Fruit and Juices | \$ 574                                        | \$ 2.33               | 0.870729                     |
| Milk and Dairy   | \$ 690                                        | \$ 2.27               | 0.910615                     |
| Grains           | \$ 420                                        | \$ 1.82               | 1                            |
| Red meat         | \$ 846                                        | \$ 6.93               | 0.876392                     |
| Beef             | \$ 386                                        | \$ 5.69               | 0.876392                     |
| Pork             | \$ 271                                        | \$ 5.09               | 0.876392                     |
| Other            | \$ 190                                        | \$ 11.9               | 0.876392                     |
| Poultry          | \$ 255                                        | \$ 3.11               | 0.937044                     |
| Eggs             | \$ 79.1                                       | \$ 2.07               | 0.923671                     |
| Fish and Seafood | \$ 216                                        | \$ 11.4               | 0.744562                     |
| Beans and Peas   | \$ 19.7                                       | \$ 2.52               | 0.877288                     |
| Nuts and Seeds   | \$ 39.0                                       | \$ 3.14               | 0.924242                     |
| Fats and Oils    | \$ 172                                        | \$ 1.43               | 0.925119                     |
| Sweeteners       | \$ 226                                        | \$ 1.32               | 0.855876                     |

**Table S3.** Estimated annual food consumption per household associated with dietary patterns among the U.S. population.

| Food Group       | Estimated and projected U.S. annual food consumption per household per year |                               |                               |                                                 |                                                 |
|------------------|-----------------------------------------------------------------------------|-------------------------------|-------------------------------|-------------------------------------------------|-------------------------------------------------|
|                  | CFP 2547<br>(2,547 kcal diet)                                               | RFP 2000<br>(2,000 kcal diet) | RFP 2600<br>(2,600 kcal diet) | RFP 2000_Veg<br>(2,000 kcal<br>vegetarian diet) | RFP 2600_Veg<br>(2,600 kcal<br>vegetarian diet) |
|                  | kg/household/year                                                           | kg/household/year             | kg/household/year             | kg/household/year                               | kg/household/year                               |
| Vegetables       | 180                                                                         | 291                           | 408                           | 291                                             | 408                                             |
| Fruit and Juices | 134                                                                         | 342                           | 342                           | 342                                             | 342                                             |
| Milk and Dairy   | 201                                                                         | 397                           | 397                           | 397                                             | 397                                             |
| Grains           | 153                                                                         | 121                           | 182                           | 121                                             | 182                                             |
| Red meat         | 87.5                                                                        | 46.6                          | 56.9                          | 0                                               | 0                                               |
| Beef             | 51.3                                                                        | 27.5                          | 33.6                          | 0                                               | 0                                               |
| Pork             | 35.4                                                                        | 18.8                          | 23.0                          | 0                                               | 0                                               |
| Lamb/Veal        | 0.22                                                                        | 0.12                          | 0.39                          | 0                                               | 0                                               |
| Poultry          | 63.5                                                                        | 38.8                          | 46.6                          | 0                                               | 0                                               |
| Eggs             | 21.4                                                                        | 18.2                          | 19.6                          | 27.4                                            | 34.2                                            |
| Fish and Seafood | 11.0                                                                        | 29.6                          | 37.0                          | 0                                               | 0                                               |
| Beans and Peas   | 6.59                                                                        | 14.4                          | 24.1                          | 14.4                                            | 24.1                                            |
| Nuts and Seeds   | 10.6                                                                        | 7.58                          | 9.47                          | 47.4                                            | 56.8                                            |
| Fats and Oils    | 72.2                                                                        | 47.3                          | 59.4                          | 38.5                                            | 52.3                                            |
| Sweeteners       | 96.5                                                                        | 29.2                          | 41.1                          | 29.2                                            | 36.0                                            |
| Total            | 1,036                                                                       | 1,383                         | 1,622                         | 1,308                                           | 1,531                                           |

**Section S1.** Calculation of total food loss using USDA ERS loss-adjusted food availability (LAFA) database.

Food loss at consumer level:

$$\text{Consumer loss} = \frac{\text{Consumption}}{(100\% - \% \text{ loss at consumer level})} - \text{Consumption}$$

Food loss at retail level:

$$\text{Retail loss} = \frac{(\text{Consumption} + \text{consumer loss})}{(100\% - \% \text{ loss at retail level})} - (\text{Consumption} + \text{consumer loss})$$

Food loss at primary level:

$$\text{Primary loss} = \frac{(\text{Consumption} + \text{consumer loss} + \text{retail loss})}{(100\% - \% \text{ loss at primary level})} - (\text{Consumption} + \text{consumer loss} + \text{retail loss})$$

$$\text{Total food loss} = \text{consumer loss} + \text{retail loss} + \text{primary loss}$$

**Table S4.** Percent of food loss at each supply chain using USDA ERS loss-adjusted food availability database.

| Food Group       | 4-year average food loss (2007-2010) |                 |                   |                |
|------------------|--------------------------------------|-----------------|-------------------|----------------|
|                  | Primary loss (%)                     | Retail loss (%) | Consumer loss (%) | Total loss (%) |
| Vegetables       | 31.9                                 | 8.48            | 34.8              | 59.3           |
| Fruit and Juices | 19.8                                 | 9.25            | 36.6              | 53.9           |
| Milk and Dairy   | 0.110                                | 11.1            | 22.5              | 31.2           |
| Grains           | 0                                    | 12.0            | 21.8              | 31.2           |
| Red meat         | 30.6 *                               | 4.47            | 23.9              | 49.6           |
| Poultry          | 37.0 *                               | 3.88            | 18.8              | 50.8           |
| Eggs             | 1.50                                 | 9.00            | 35.0              | 41.7           |
| Fish and Seafood | 0                                    | 8.18            | 34.1              | 39.5           |
| Beans and Peas   | 0                                    | 6.00            | 10.0              | 15.4           |
| Nuts and Seeds   | 0                                    | 6.00            | 9.18              | 14.6           |
| Fats and Oils    | 0.139                                | 19.2            | 20.7              | 36.0           |
| Sweeteners       | 0                                    | 11.0            | 32.6              | 40.0           |

\* Loss rate of carcass-weight to boneless-weight.

**Table S5.** The allocation fraction between primary and secondary product (by-product) by NAICS revenue data [2] and USDA ERS data [3].

| Food Group       | Fraction of primary product (%) | Fraction of by-product (%) |
|------------------|---------------------------------|----------------------------|
| Vegetables       | 92.0                            | 8.0                        |
| Fruit and Juices | 92.0                            | 8.0                        |
| Milk and Dairy   | 87.1                            | 12.9                       |
| Grains           | 92.7                            | 7.3                        |
| Beef             | 88.6 *                          | 11.4 *                     |
| Pork             | 92.5 *                          | 7.5 *                      |
| Other meat       | 92.3                            | 7.7                        |
| Poultry          | 98.3                            | 1.7                        |
| Eggs             | 97.0                            | 3.0                        |
| Fish and Seafood | 98.0                            | 2.0                        |
| Beans and Peas   | 87.9                            | 12.1                       |
| Nuts and Seeds   | 96.1                            | 3.9                        |
| Fats and Oils    | 90.3                            | 9.7                        |
| Sweeteners       | 88.4                            | 11.6                       |

\* USDA ERS data was used because NAICS does not report disaggregated revenue data for each red meat.

**Table S6.** Food group allocation fraction for the estimation of space share of each food group at a typical supermarket and environmental burdens at retail phase and consumer phase.

| Food Group       | Supermarket cooling plus refrigeration | Supermarket overhead or Passenger car | Home refrigerator <sup>1</sup> | Food preparation or Dish washer <sup>1</sup> |
|------------------|----------------------------------------|---------------------------------------|--------------------------------|----------------------------------------------|
| Vegetables       | 10.2%                                  | 5.30%                                 | 14.0%                          | 11.6%                                        |
| Fruit and Juices | 10.8%                                  | 5.63%                                 | 14.8%                          | 12.3%                                        |
| Milk and Dairy   | 13.0%                                  | 6.76%                                 | 17.8%                          | 14.8%                                        |
| Grains           | 2.31%                                  | 4.12%                                 | -                              | 9.02%                                        |
| Red meat         | 16.0%                                  | 8.30%                                 | 21.9%                          | 18.2%                                        |
| Poultry          | 4.81%                                  | 2.50%                                 | 6.60%                          | 5.48%                                        |
| Eggs             | 1.49%                                  | 0.78%                                 | 2.05%                          | 1.70%                                        |
| Fish and Seafood | 4.07%                                  | 2.12%                                 | 5.58%                          | 4.64%                                        |
| Beans and Peas   | 0.11%                                  | 0.19%                                 | -                              | 0.42%                                        |
| Nuts and Seeds   | 0.21%                                  | 0.38%                                 | -                              | 0.84%                                        |
| Fats and Oils    | 2.10%                                  | 1.69%                                 | 2.22%                          | 3.69%                                        |
| Sweeteners       | 1.24%                                  | 2.22%                                 | -                              | 4.86%                                        |
| Total            | 66.4%                                  | 40.0%                                 | 85.0%                          | 87.6%                                        |

<sup>1</sup> Nonalcoholic and alcoholic beverages represent the remainders of cumulative total.

**Table S7.** Store counts by grocery channels.

| Channels          | Number of stores | Area per store (m <sup>2</sup> ) | Supermarket equivalent area weighted number of stores |
|-------------------|------------------|----------------------------------|-------------------------------------------------------|
| Supermarket       | 32,030           | 4,270                            | 32,030                                                |
| Mass Merchandiser | 7,270            | 3,900                            | 6,640                                                 |
| Convenience       | 185,980          | 430                              | 18,870                                                |
| Total             | 225,280          | 4,270                            | 57,540                                                |

**Section S2** presents a representative calculation of retail burdens for the vegetables group as an example at a typical supermarket outlet. Non-refrigerated food groups have similar reference data except for refrigeration burden. The electricity consumption per kg of vegetables was calculated based on a national average supermarket store area [4] (**Table S7**) along with the average quantity of vegetables displayed per year (estimated from LAFA data of consumer purchases plus retail losses). Similar procedures were applied to calculate refrigerant loss, natural gas, and water usage burdens. There is a typical load of 1,590 kg of refrigerant and an average annual leak rate of 20% [5]. Stand-alone refrigeration equipment has a relatively small refrigerant charge and leak rate, thus it was not accounted [6]. The estimated burdens for other food groups are presented in **Table S8**.

**Section S2.** Calculation of retail burdens for the vegetables group at a typical supermarket outlet.

| Composition                  | Symbol     | Composition                         | Symbol    |
|------------------------------|------------|-------------------------------------|-----------|
| Total grocery store area     | $A_{G,T}$  | Annual electricity burden           | $V_{E,G}$ |
| Natural gas usage            | $C_{N,A}$  | Electricity burden per kg displayed | $V_{E,M}$ |
| Water consumption            | $C_{W,A}$  | Annual natural gas burden           | $V_{N,G}$ |
| Natural gas overhead demand  | $D_{N,O}$  | Natural gas burden per kg displayed | $V_{N,M}$ |
| Annual refrigerant leak rate | $LR_{R,A}$ | Annual refrigerant burden           | $V_{R,G}$ |
| Fractional total space share | $FS_{V,T}$ | Refrigerant burden per kg displayed | $V_{R,M}$ |
| Annual natural gas burden    | $V_{N,G}$  | Annual water usage                  | $V_{W,G}$ |
| Annual water usage           | $V_{W,G}$  | Water usage per kg displayed        | $V_{W,M}$ |

Electricity burden in a typical supermarket:

$$V_{E,G} = C_{E,A} \times A_{G,T} \times (D_{E,O} \times FS_{V,T} + D_{E,R} \times FS_{V,R})$$

Refrigerant loss burden in a typical supermarket:

$$V_{R,G} = L_{R,T} \times LR_{R,A} \times FS_{V,R}$$

Natural gas burden in a typical supermarket:

$$V_{N,G} = C_{N,A} \times A_{G,T} \times D_{N,O} \times FS_{V,T}$$

Water usage burden in a typical supermarket:

$$V_{W,G} = C_{W,A} \times A_{G,T} \times FS_{V,T}$$

Electricity burden per kg of vegetables displayed:

$$V_{E,M} \left( \frac{kWh}{kg} \right) = V_{E,G} \left( \frac{kWh}{year} \right) \times \frac{\text{Supermarket equivalent area weighted number of stores}}{\text{Total vegetables displayed (kg)/year}}$$

Natural gas burden per kg of vegetables displayed:

$$V_{N,M} \left( \frac{m^3}{kg} \right) = V_{N,G} \left( \frac{m^3}{year} \right) \times \frac{\text{Supermarket equivalent area weighted number of stores}}{\text{Total vegetables displayed (kg)/year}}$$

Refrigerant burden per kg of vegetables displayed:

$$V_{R,M} \left( \frac{kg}{kg} \right) = V_{R,G} \left( \frac{kg}{year} \right) \times \frac{\text{Supermarket equivalent area weighted number of stores}}{\text{Total vegetables displayed (kg)/year}}$$

Water usage per kg of vegetables displayed:

$$V_{W,M} \left( \frac{liter}{kg} \right) = V_{W,G} \left( \frac{liter}{year} \right) \times \frac{\text{Supermarket equivalent area weighted number of stores}}{\text{Total vegetables displayed (kg)/year}}$$

**Table S8.** Allocated burdens in a typical supermarket and allocated burdens per kg displayed across all other food groups.

| Food Group       | Input       | Annual burden<br>in a typical supermarket |                      | Burden per<br>kg displayed |                    |
|------------------|-------------|-------------------------------------------|----------------------|----------------------------|--------------------|
| Fruit and Juices | Electricity | 184,446                                   | kWh/year             | 3.52e-01                   | kWh/kg             |
|                  | Natural gas | 3,202                                     | m <sup>3</sup> /year | 6.11e-03                   | m <sup>3</sup> /kg |
|                  | Refrigerant | 34.5                                      | kg/year              | 6.75e-05                   | kg/kg              |
|                  | Water       | 6.92e+05                                  | liter/year           | 1.319                      | liter/kg           |
| Milk and Dairy   | Electricity | 221,612                                   | kWh/year             | 3.44e-01                   | kWh/kg             |
|                  | Natural gas | 3,848                                     | m <sup>3</sup> /year | 5.97e-03                   | m <sup>3</sup> /kg |
|                  | Refrigerant | 41.4                                      | kg/year              | 6.43e-05                   | kg/kg              |
|                  | Water       | 8.31e+05                                  | liter/year           | 1.291                      | liter/kg           |
| Grains           | Electricity | 77,506                                    | kWh/year             | 1.58e-01                   | kWh/kg             |
|                  | Natural gas | 2,345                                     | m <sup>3</sup> /year | 4.79e-03                   | m <sup>3</sup> /kg |
|                  | Refrigerant | 7.3                                       | kg/year              | 1.50e-05                   | kg/kg              |
|                  | Water       | 5.07e+05                                  | liter/year           | 1.034                      | liter/kg           |
| Red meat         | Electricity | 272,041                                   | kWh/year             | 1.05e+00                   | kWh/kg             |
|                  | Natural gas | 4,724                                     | m <sup>3</sup> /year | 1.82e-02                   | m <sup>3</sup> /kg |
|                  | Refrigerant | 50.8                                      | kg/year              | 1.96e-04                   | kg/kg              |
|                  | Water       | 1.02e+06                                  | liter/year           | 3.929                      | liter/kg           |
| Poultry          | Electricity | 81,930                                    | kWh/year             | 4.70e-01                   | kWh/kg             |
|                  | Natural gas | 1,423                                     | m <sup>3</sup> /year | 8.16e-03                   | m <sup>3</sup> /kg |
|                  | Refrigerant | 15.3                                      | kg/year              | 8.78e-05                   | kg/kg              |
|                  | Water       | 3.07e+05                                  | liter/year           | 1.763                      | liter/kg           |
| Eggs             | Electricity | 25,422                                    | kWh/year             | 3.13e-01                   | kWh/kg             |
|                  | Natural gas | 441                                       | m <sup>3</sup> /year | 5.43e-03                   | m <sup>3</sup> /kg |
|                  | Refrigerant | 4.75                                      | kg/year              | 5.84e-05                   | kg/kg              |
|                  | Water       | 9.54e+04                                  | liter/year           | 1.173                      | liter/kg           |
| Fish and Seafood | Electricity | 69,357                                    | kWh/year             | 1.72e+00                   | kWh/kg             |
|                  | Natural gas | 1,204                                     | m <sup>3</sup> /year | 2.99e-02                   | m <sup>3</sup> /kg |
|                  | Refrigerant | 13.0                                      | kg/year              | 3.22e-04                   | kg/kg              |
|                  | Water       | 2.60e+05                                  | liter/year           | 6.458                      | liter/kg           |
| Beans and Peas   | Electricity | 3,640                                     | kWh/year             | 2.18e-01                   | kWh/kg             |
|                  | Natural gas | 110                                       | m <sup>3</sup> /year | 6.61e-03                   | m <sup>3</sup> /kg |
|                  | Refrigerant | 0.35                                      | kg/year              | 2.07e-05                   | kg/kg              |
|                  | Water       | 2.38e+04                                  | liter/year           | 1.427                      | liter/kg           |
| Nuts and Seeds   | Electricity | 7,202                                     | kWh/year             | 2.72e-01                   | kWh/kg             |
|                  | Natural gas | 218                                       | m <sup>3</sup> /year | 8.24e-03                   | m <sup>3</sup> /kg |
|                  | Refrigerant | 0.68                                      | kg/year              | 2.58e-05                   | kg/kg              |
|                  | Water       | 4.71e+04                                  | liter/year           | 1.780                      | liter/kg           |
| Fats and Oils    | Electricity | 26,612                                    | kWh/year             | 1.04e-01                   | kWh/kg             |
|                  | Natural gas | 225                                       | m <sup>3</sup> /year | 8.83e-04                   | m <sup>3</sup> /kg |
|                  | Refrigerant | 6.66                                      | kg/year              | 2.61e-05                   | kg/kg              |
|                  | Water       | 4.87e+04                                  | liter/year           | 0.191                      | liter/kg           |
| Sweeteners       | Electricity | 41,715                                    | kWh/year             | 1.15e-01                   | kWh/kg             |
|                  | Natural gas | 1,262                                     | m <sup>3</sup> /year | 3.47e-03                   | m <sup>3</sup> /kg |
|                  | Refrigerant | 3.95                                      | kg/year              | 1.09e-05                   | kg/kg              |
|                  | Water       | 2.73e+05                                  | liter/year           | 0.750                      | liter/kg           |



**Section S3.** Calculation of consumer phase for the vegetables group as an example.

Passenger car distance traveled:

$$\text{Travel distance } \left(\frac{\text{km}}{\text{kg}}\right) = 104 \left(\frac{\text{trip}}{\text{year}}\right) \times 10.3 \left(\frac{\text{km}}{\text{trip}}\right) \times \frac{\text{Allocation fraction of vegetables group}}{\text{Retail purchased (kg) per household/year}}$$

Home refrigerator electricity usage:

$$\text{Electricity usage } \left(\frac{\text{kWh}}{\text{kg}}\right) = 1,250 \left(\frac{\text{kWh}}{\text{year}}\right) \times \frac{\text{Refrigeration fraction of vegetables group}}{\text{Retail purchased (kg) per household/year}}$$

**Table S9.** Energy consumption per kilogram of commodities in the consumer phase across all food groups.

| Food Group       | Passenger car distance traveled for shopping in km per kg | Home refrigeration in kWh per kg | Food preparation appliances in kWh per kg |
|------------------|-----------------------------------------------------------|----------------------------------|-------------------------------------------|
| Vegetables       | 0.179                                                     | 0.552                            | 1.31                                      |
| Fruit and Juices | 0.244                                                     | 0.752                            | 0.207                                     |
| Milk and Dairy   | 0.239                                                     | 0.736                            | 0.482                                     |
| Grains           | 0.192                                                     | -                                | 1.56                                      |
| Red meat         | 0.744                                                     | 2.29                             | 2.39                                      |
| Poultry          | 0.326                                                     | 1.01                             | 2.52                                      |
| Eggs             | 0.217                                                     | 0.669                            | 0.514                                     |
| Fish and Seafood | 1.20                                                      | 3.68                             | 1.88                                      |
| Beans and Peas   | 0.264                                                     | -                                | 0.562                                     |
| Nuts and Seeds   | 0.330                                                     | -                                | 0.568                                     |
| Fats and Oils    | 0.150                                                     | 0.232                            | 2.58                                      |
| Sweeteners       | 0.139                                                     | -                                | 0.485                                     |

**Table S10.** Electricity consumption of food preparation appliances for each food group per household per year. The allocation was based on the household expenditure data.

| Food Preparation | kWh/year per household | Vegetables | Fruit and Juices | Milk and Dairy | Grains | Red Meat | Poultry | Eggs  | Fish and Seafood | Beans and Peas | Nuts and Seeds | Fats and Oils | Sweeteners |
|------------------|------------------------|------------|------------------|----------------|--------|----------|---------|-------|------------------|----------------|----------------|---------------|------------|
| Blender          | 1                      | 0.574      | 0.426            |                |        |          |         |       |                  |                |                |               |            |
| Broiler          | 85                     |            |                  |                |        | 46.0     | 33.3    |       | 5.75             |                |                |               |            |
| Carving Knife    | 8                      | 3.03       | 2.25             |                |        | 1.47     | 1.07    |       | 0.184            |                |                |               |            |
| Coffee Maker     | 140                    |            |                  |                |        |          |         |       |                  |                |                | 140           |            |
| Deep Fryer       | 83                     | 36.1       |                  |                |        | 17.6     | 12.7    |       | 2.20             |                |                | 14.5          |            |
| Dishwasher       | 225                    | 39.1       | 29.0             | 43.7           | 33.1   | 19.0     | 13.8    | 4.65  | 2.38             | 1.43           | 2.29           | 15.7          | 20.9       |
| Egg Cooker       | 0.14                   |            |                  |                |        |          |         | 0.140 |                  |                |                |               |            |
| Frying Pan       | 100                    | 33.8       |                  |                |        | 14.5     | 11.9    | 4.03  | 2.06             |                |                | 13.6          | 18.1       |
| Hot Plate        | 90                     | 15.6       | 11.6             | 17.5           | 13.3   | 7.60     | 5.51    | 1.86  | 0.951            | 0.572          | 0.916          | 6.27          | 8.38       |
| Mixer            | 2                      |            | 0.457            | 0.689          | 0.523  |          |         |       |                  |                |                |               | 0.330      |
| Microwave        | 280                    | 55.8       |                  | 62.4           | 47.3   | 17.1     | 19.7    | 6.64  | 3.40             | 2.04           | 3.27           | 22.4          | 29.9       |
| Range with Oven  | 700                    | 222        |                  |                | 189    | 108      | 78.4    |       | 13.5             |                |                | 89.2          |            |
| Roaster          | 60                     |            |                  |                |        | 32.4     | 23.5    |       | 4.06             |                |                |               |            |
| Sandwich Grill   | 33                     |            |                  | 10.9           | 8.27   | 4.74     | 3.44    | 1.16  | 0.593            |                |                | 3.91          |            |
| Toaster          | 39                     |            |                  |                | 39.0   |          |         |       |                  |                |                |               |            |
| Trash Compactor  | 50                     | 8.68       | 6.44             | 9.71           | 7.36   | 4.22     | 3.06    | 1.03  | 0.528            | 0.318          | 0.509          | 3.48          | 4.65       |
| Waffle Iron      | 20                     |            |                  |                | 20.0   |          |         |       |                  |                |                |               |            |
| Waste Dispenser  | 7                      | 1.22       | 0.902            | 1.36           | 1.03   | 0.591    | 0.429   | 0.145 | 0.074            | 0.044          | 0.071          | 0.488         | 0.652      |
| Total            | 1,923                  | 416        | 51.1             | 146            | 359    | 285      | 207     | 19.7  | 35.7             | 4.41           | 7.06           | 309           | 83.0       |

**Table S11.** Type of packaging materials used for each food group.

| Food Group       | Type of packaging material*                                                     |
|------------------|---------------------------------------------------------------------------------|
| Vegetables       | Flexible plastics, metal cans[7]                                                |
| Fruit and Juices | Paperboard cartons, rigid and flexible plastics, metal cans[7]                  |
| Milk and Dairy   | Paperboard cartons, rigid and flexible plastics, glass, aluminum, metal cans[7] |
| Grains           | Paper bags, rigid and flexible plastics[7]                                      |
| Red meat         | Rigid and flexible plastics, foam, paper bags, metal cans[8]                    |
| Poultry          | Rigid and flexible plastics, foam, paper bags[8]                                |
| Eggs             | Paperboard carton, wood pulp, filler tray[9]                                    |
| Fish and Seafood | Rigid and flexible plastics, paper bags, metal cans[8]                          |
| Beans and Peas   | Flexible plastics, metal cans[7]                                                |
| Nuts and Seeds   | Rigid and flexible plastics, metal cans[7]                                      |
| Fats and Oils    | Paper bags, rigid and flexible plastics, glass[7]                               |
| Sweeteners       | Rigid and flexible plastics[7]                                                  |

\* Corrugated box, plastic bag, wood pallet, and aluminum (foil) usage is distributed to all of each food group.

**Table S12.** Food packaging types and estimated amount of packaging materials used for each food group in million tons.

|                 | Corrugated boxes | paperboard carton | Kraft paper | Rigid plastic | Flexible plastic | Glass | Wood pallet | Aluminum | Metals |
|-----------------|------------------|-------------------|-------------|---------------|------------------|-------|-------------|----------|--------|
| Vegetables      | 4.51             | -                 | -           | -             | 1.11             | -     | 1.08        | 0.051    | 0.432  |
| Fruits & Juices | 3.51             | 1.40              | -           | 0.388         | 0.867            | -     | 0.837       | 0.039    | 0.336  |
| Milk and dairy  | 1.15*            | 2.12              | -           | 0.476         | 1.86             | 1.00  | 1.03        | 0.048    | 0.413  |
| Grains          | 3.28             | -                 | 0.720       | 0.362         | 0.810            | -     | 0.782       | 0.037    | -      |
| Red meat        | 1.74             | -                 | 0.382       | 0.192         | 0.429            | -     | 0.415       | 0.020    | 0.166  |
| Poultry         | 1.17             | -                 | 0.256       | 0.129         | 0.288            | -     | 0.278       | 0.013    | -      |
| Eggs            | 0.544            | 0.217             | -           | -             | 0.134            | -     | 0.130       | 0.006    | -      |
| Fish/Seafood    | 0.270            | -                 | -           | 0.030         | 0.067            | -     | 0.064       | 0.003    | 0.026  |
| Beans/Peas      | 0.112            | -                 | -           | 0.012         | 0.028            | -     | 0.027       | 0.001    | 0.011  |
| Nuts/Seeds      | 0.177            | -                 | -           | 0.020         | 0.044            | -     | 0.042       | 0.002    | 0.017  |
| Fats/Oils       | 1.71             | -                 | 0.375       | 0.189         | 0.422            | 0.397 | 0.408       | 0.019    | -      |
| Sweeteners      | 2.43             | -                 | -           | 0.269         | 0.601            | -     | 0.580       | 0.027    | -      |
| Total           | 20.6             | 3.73              | 1.73        | 2.07          | 6.67             | 1.40  | 5.67        | 0.267    | 1.40   |

\* Corrugated box was not assigned to fluid milk portion (69.2%) in milk/dairy group. Fluid milk uses HDPE crate for transportation.

**Table S13.** Relative contribution of the food groups to the environmental impact, e.g. GHGEs per household per year across the different dietary scenarios.

| Food Groups / Scenarios | CFP<br>2547 kcal | RFP<br>2000 kcal | RFP<br>2600 kcal | RFP<br>2000 kcal Veg | RFP<br>2600 kcal Veg |
|-------------------------|------------------|------------------|------------------|----------------------|----------------------|
| Total vegetables        | 0.97             | 1.57             | 2.20             | 1.57                 | 2.20                 |
| Fruit and Juices        | 0.72             | 1.85             | 1.85             | 1.85                 | 1.85                 |
| Milk and Dairy          | 1.17             | 2.31             | 2.31             | 2.31                 | 2.31                 |
| Grains                  | 0.45             | 0.35             | 0.53             | 0.35                 | 0.53                 |
| Total red meat          | 3.65             | 1.94             | 2.37             | 0.00                 | 0.00                 |
| Poultry                 | 0.68             | 0.41             | 0.50             | 0.00                 | 0.00                 |
| Eggs                    | 0.16             | 0.14             | 0.15             | 0.21                 | 0.26                 |
| Fish/Seafood            | 0.22             | 0.58             | 0.73             | 0.00                 | 0.00                 |
| Beans and Peas          | 0.03             | 0.06             | 0.10             | 0.06                 | 0.10                 |
| Nuts/Seeds/Soy          | 0.04             | 0.03             | 0.03             | 0.16                 | 0.20                 |
| Fats and Oils           | 0.37             | 0.24             | 0.30             | 0.20                 | 0.27                 |
| Sweeteners              | 0.35             | 0.11             | 0.15             | 0.11                 | 0.13                 |
| Total                   | 8.80             | 9.61             | 11.23            | 6.83                 | 7.85                 |

**Table S14.** Relative contribution of each food group to environmental impacts associated with dietary patterns.

| CFP 2,547 kcal        |                       |            |               |             |        |          |         |       |               |             |             |            |            |
|-----------------------|-----------------------|------------|---------------|-------------|--------|----------|---------|-------|---------------|-------------|-------------|------------|------------|
| Impact category       | Unit                  | Vegetables | Fruit/ Juices | Milk/ Dairy | Grains | Red meat | Poultry | Eggs  | Fish/ Seafood | Beans/ Peas | Nuts/ Seeds | Fats/ Oils | Sweeteners |
| Ozone depletion       | kg CFC-11 eq          | 17.0%      | 16.4%         | 11.8%       | 4.20%  | 26.5%    | 7.08%   | 2.32% | 2.16%         | 0.84%       | 1.10%       | 5.84%      | 4.78%      |
| Global warming        | kg CO <sub>2</sub> eq | 11.04%     | 8.23%         | 13.3%       | 5.07%  | 41.5%    | 7.69%   | 1.86% | 2.45%         | 0.31%       | 0.42%       | 4.17%      | 3.99%      |
| Smog                  | kg O <sup>3</sup> eq  | 4.32%      | 3.37%         | 11.6%       | 1.43%  | 54.1%    | 13.9%   | 5.47% | 1.29%         | 0.30%       | 0.21%       | 2.34%      | 1.72%      |
| Acidification         | kg SO <sub>2</sub> eq | 4.84%      | 3.68%         | 11.5%       | 1.69%  | 52.5%    | 13.5%   | 5.26% | 1.32%         | 0.33%       | 0.24%       | 2.68%      | 2.49%      |
| Eutrophication        | kg N eq               | 9.16%      | 5.71%         | 7.12%       | 4.74%  | 21.9%    | 30.8%   | 12.4% | 1.52%         | 0.31%       | 0.22%       | 4.36%      | 1.72%      |
| Carcinogenics         | CTUh                  | 17.9%      | 11.1%         | 12.9%       | 8.86%  | 23.4%    | 9.89%   | 1.72% | 3.58%         | 0.23%       | 0.39%       | 7.06%      | 3.04%      |
| Non carcinogenics     | CTUh                  | 23.1%      | 14.0%         | 8.33%       | 7.69%  | 23.2%    | 8.27%   | 1.98% | 2.01%         | 0.24%       | 0.36%       | 5.34%      | 5.55%      |
| Respiratory effects   | kg PM2.5 eq           | 13.2%      | 7.87%         | 13.2%       | 7.24%  | 31.6%    | 11.1%   | 2.74% | 3.24%         | 0.26%       | 0.32%       | 6.55%      | 2.68%      |
| Ecotoxicity           | CTUe                  | 24.1%      | 13.6%         | 5.67%       | 8.49%  | 23.2%    | 7.66%   | 2.32% | 1.27%         | 0.39%       | 0.37%       | 6.37%      | 6.68%      |
| Fossil fuel depletion | MJ surplus            | 11.68%     | 9.60%         | 12.1%       | 5.28%  | 34.8%    | 8.92%   | 2.18% | 4.70%         | 0.44%       | 0.63%       | 4.36%      | 5.29%      |
| RFP 2,000 kcal        |                       |            |               |             |        |          |         |       |               |             |             |            |            |
| Impact category       | Unit                  | Vegetables | Fruit/ Juices | Milk/ Dairy | Grains | Red meat | Poultry | Eggs  | Fish/ Seafood | Beans/ Peas | Nuts/ Seeds | Fats/ Oils | Sweeteners |
| Ozone depletion       | kg CFC-11 eq          | 21.1%      | 32.3%         | 17.9%       | 2.56%  | 10.8%    | 3.33%   | 1.52% | 4.48%         | 1.40%       | 0.61%       | 2.94%      | 1.11%      |
| Global warming        | kg CO <sub>2</sub> eq | 16.4%      | 19.3%         | 24.1%       | 3.68%  | 20.2%    | 4.31%   | 1.45% | 6.07%         | 0.61%       | 0.27%       | 2.51%      | 1.11%      |
| Smog                  | kg O <sup>3</sup> eq  | 7.96%      | 9.80%         | 26.1%       | 1.29%  | 32.7%    | 9.64%   | 5.29% | 3.97%         | 0.75%       | 0.17%       | 1.74%      | 0.59%      |
| Acidification         | kg SO <sub>2</sub> eq | 8.82%      | 10.60%        | 25.5%       | 1.51%  | 31.4%    | 9.27%   | 5.03% | 4.02%         | 0.82%       | 0.19%       | 1.97%      | 0.85%      |
| Eutrophication        | kg N eq               | 15.4%      | 15.1%         | 14.5%       | 3.89%  | 12.1%    | 19.5%   | 10.9% | 4.24%         | 0.71%       | 0.17%       | 2.96%      | 0.54%      |
| Carcinogenics         | CTUh                  | 23.1%      | 22.5%         | 20.2%       | 5.59%  | 9.9%     | 4.81%   | 1.17% | 7.7%          | 0.40%       | 0.22%       | 3.68%      | 0.73%      |
| Non carcinogenics     | CTUh                  | 29.6%      | 28.3%         | 13.0%       | 4.83%  | 9.8%     | 4.01%   | 1.33% | 4.30%         | 0.42%       | 0.21%       | 2.77%      | 1.33%      |
| Respiratory effects   | kg PM2.5 eq           | 18.8%      | 17.7%         | 22.9%       | 5.05%  | 14.8%    | 5.96%   | 2.05% | 7.7%          | 0.49%       | 0.20%       | 3.77%      | 0.71%      |
| Ecotoxicity           | CTUe                  | 32.1%      | 28.6%         | 9.2%        | 5.55%  | 10.2%    | 3.86%   | 1.63% | 2.82%         | 0.71%       | 0.22%       | 3.44%      | 1.67%      |
| Fossil fuel depletion | MJ surplus            | 16.3%      | 21.2%         | 20.6%       | 3.61%  | 15.9%    | 4.70%   | 1.60% | 10.9%         | 0.84%       | 0.39%       | 2.46%      | 1.38%      |
| RFP 2,600 kcal        |                       |            |               |             |        |          |         |       |               |             |             |            |            |
| Impact category       | Unit                  | Vegetables | Fruit/ Juices | Milk/ Dairy | Grains | Red meat | Poultry | Eggs  | Fish/ Seafood | Beans/ Peas | Nuts/ Seeds | Fats/ Oils | Sweeteners |
| Ozone depletion       | kg CFC-11 eq          | 25.4%      | 27.7%         | 15.4%       | 3.30%  | 11.4%    | 3.43%   | 1.40% | 4.81%         | 2.01%       | 0.65%       | 3.17%      | 1.34%      |
| Global warming        | kg CO <sub>2</sub> eq | 19.6%      | 16.5%         | 20.6%       | 4.73%  | 21.1%    | 4.42%   | 1.34% | 6.49%         | 0.88%       | 0.29%       | 2.69%      | 1.33%      |
| Smog                  | kg O <sup>3</sup> eq  | 9.64%      | 8.47%         | 22.6%       | 1.67%  | 34.6%    | 10.00%  | 4.92% | 4.29%         | 1.08%       | 0.19%       | 1.89%      | 0.72%      |
| Acidification         | kg SO <sub>2</sub> eq | 10.65%     | 9.14%         | 22.0%       | 1.95%  | 33.1%    | 9.60%   | 4.67% | 4.34%         | 1.18%       | 0.21%       | 2.14%      | 1.03%      |
| Eutrophication        | kg N eq               | 18.2%      | 12.8%         | 12.3%       | 4.94%  | 12.5%    | 19.8%   | 9.92% | 4.49%         | 1.01%       | 0.18%       | 3.15%      | 0.64%      |
| Carcinogenics         | CTUh                  | 27.2%      | 18.9%         | 17.0%       | 7.06%  | 10.2%    | 4.86%   | 1.06% | 8.1%          | 0.57%       | 0.24%       | 3.89%      | 0.87%      |
| Non carcinogenics     | CTUh                  | 34.6%      | 23.6%         | 10.9%       | 6.04%  | 10.0%    | 4.01%   | 1.20% | 4.48%         | 0.58%       | 0.21%       | 2.90%      | 1.56%      |
| Respiratory effects   | kg PM2.5 eq           | 22.2%      | 15.0%         | 19.3%       | 6.40%  | 15.3%    | 6.05%   | 1.86% | 8.1%          | 0.70%       | 0.21%       | 4.00%      | 0.85%      |
| Ecotoxicity           | CTUe                  | 37.0%      | 23.5%         | 7.60%       | 6.85%  | 10.2%    | 3.81%   | 1.44% | 2.90%         | 0.98%       | 0.22%       | 3.56%      | 1.93%      |
| Fossil fuel depletion | MJ surplus            | 19.4%      | 18.0%         | 17.6%       | 4.61%  | 16.6%    | 4.80%   | 1.46% | 11.6%         | 1.19%       | 0.42%       | 2.63%      | 1.65%      |
| RFP 2,000 kcal_Veg    |                       |            |               |             |        |          |         |       |               |             |             |            |            |
| Impact category       | Unit                  | Vegetables | Fruit/ Juices | Milk/ Dairy | Grains | Red meat | Poultry | Eggs  | Fish/ Seafood | Beans/ Peas | Nuts/ Seeds | Fats/ Oils | Sweeteners |
| Ozone depletion       | kg CFC-11 eq          | 24.9%      | 38.1%         | 21.1%       | 3.02%  | 0.0%     | 0.0%    | 2.68% | 0.0%          | 1.66%       | 4.47%       | 2.82%      | 1.31%      |
| Global warming        | kg CO <sub>2</sub> eq | 23.1%      | 27.1%         | 33.9%       | 5.18%  | 0.0%     | 0.0%    | 3.07% | 0.0%          | 0.86%       | 2.41%       | 2.87%      | 1.56%      |
| Smog                  | kg O <sup>3</sup> eq  | 14.0%      | 17.2%         | 45.8%       | 2.27%  | 0.0%     | 0.0%    | 13.9% | 0.0%          | 1.31%       | 1.91%       | 2.49%      | 1.04%      |
| Acidification         | kg SO <sub>2</sub> eq | 15.1%      | 18.1%         | 43.6%       | 2.58%  | 0.0%     | 0.0%    | 12.9% | 0.0%          | 1.40%       | 2.08%       | 2.74%      | 1.45%      |
| Eutrophication        | kg N eq               | 22.0%      | 21.6%         | 20.8%       | 5.56%  | 0.0%     | 0.0%    | 23.4% | 0.0%          | 1.02%       | 1.48%       | 3.44%      | 0.77%      |
| Carcinogenics         | CTUh                  | 29.4%      | 28.6%         | 25.7%       | 7.11%  | 0.0%     | 0.0%    | 2.23% | 0.0%          | 0.51%       | 1.79%       | 3.81%      | 0.93%      |
| Non carcinogenics     | CTUh                  | 35.6%      | 34.1%         | 15.7%       | 5.82%  | 0.0%     | 0.0%    | 2.41% | 0.0%          | 0.50%       | 1.54%       | 2.71%      | 1.60%      |
| Respiratory effects   | kg PM2.5 eq           | 25.7%      | 24.2%         | 31.3%       | 6.92%  | 0.0%     | 0.0%    | 4.21% | 0.0%          | 0.68%       | 1.71%       | 4.20%      | 0.98%      |
| Ecotoxicity           | CTUe                  | 38.0%      | 33.9%         | 10.9%       | 6.57%  | 0.0%     | 0.0%    | 2.89% | 0.0%          | 0.84%       | 1.61%       | 3.32%      | 1.97%      |
| Fossil fuel depletion | MJ surplus            | 23.0%      | 29.9%         | 29.1%       | 5.10%  | 0.0%     | 0.0%    | 3.39% | 0.0%          | 1.19%       | 3.46%       | 2.83%      | 1.95%      |
| RFP 2,600 kcal_Veg    |                       |            |               |             |        |          |         |       |               |             |             |            |            |
| Impact category       | Unit                  | Vegetables | Fruit/ Juices | Milk/ Dairy | Grains | Red meat | Poultry | Eggs  | Fish/ Seafood | Beans/ Peas | Nuts/ Seeds | Fats/ Oils | Sweeteners |
| Ozone depletion       | kg CFC-11 eq          | 30.2%      | 33.0%         | 18.3%       | 3.92%  | 0.0%     | 0.0%    | 2.90% | 0.0%          | 2.39%       | 4.65%       | 3.31%      | 1.40%      |
| Global warming        | kg CO <sub>2</sub> eq | 28.1%      | 23.6%         | 29.4%       | 6.76%  | 0.0%     | 0.0%    | 3.33% | 0.0%          | 1.25%       | 2.51%       | 3.39%      | 1.67%      |
| Smog                  | kg O <sup>3</sup> eq  | 17.4%      | 15.3%         | 40.7%       | 3.02%  | 0.0%     | 0.0%    | 15.5% | 0.0%          | 1.94%       | 2.03%       | 3.00%      | 1.14%      |
| Acidification         | kg SO <sub>2</sub> eq | 18.6%      | 16.0%         | 38.6%       | 3.42%  | 0.0%     | 0.0%    | 14.2% | 0.0%          | 2.06%       | 2.20%       | 3.29%      | 1.58%      |
| Eutrophication        | kg N eq               | 25.7%      | 18.0%         | 17.4%       | 6.96%  | 0.0%     | 0.0%    | 24.4% | 0.0%          | 1.42%       | 1.48%       | 3.90%      | 0.79%      |
| Carcinogenics         | CTUh                  | 34.8%      | 24.2%         | 21.7%       | 9.03%  | 0.0%     | 0.0%    | 2.36% | 0.0%          | 0.7%        | 1.81%       | 4.38%      | 0.97%      |
| Non carcinogenics     | CTUh                  | 41.7%      | 28.5%         | 13.1%       | 7.28%  | 0.0%     | 0.0%    | 2.51% | 0.0%          | 0.70%       | 1.55%       | 3.08%      | 1.65%      |
| Respiratory effects   | kg PM2.5 eq           | 30.7%      | 20.7%         | 26.7%       | 8.84%  | 0.0%     | 0.0%    | 4.49% | 0.0%          | 1.0%        | 1.75%       | 4.86%      | 1.03%      |
| Ecotoxicity           | CTUe                  | 43.7%      | 27.8%         | 9.0%        | 8.09%  | 0.0%     | 0.0%    | 2.97% | 0.0%          | 1.15%       | 1.59%       | 3.70%      | 2.00%      |
| Fossil fuel depletion | MJ surplus            | 27.9%      | 25.9%         | 25.2%       | 6.62%  | 0.0%     | 0.0%    | 3.67% | 0.0%          | 1.71%       | 3.59%       | 3.32%      | 2.08%      |

**Table S15.** Results of 1,000 Monte Carlo runs for uncertainty analysis associated with dietary patterns.

| CFP 2,547 kcal        |                       |          |          |          |          |          |          |
|-----------------------|-----------------------|----------|----------|----------|----------|----------|----------|
| Impact category       | Unit                  | Mean     | Median   | SD       | CV       | 2.5%     | 97.5%    |
| Ozone depletion       | kg CFC-11 eq          | 1.08E-02 | 1.07E-02 | 7.50E-04 | 6.95E+00 | 9.45E-03 | 1.24E-02 |
| Global warming        | kg CO <sub>2</sub> eq | 8.81E+03 | 8.76E+03 | 5.24E+02 | 5.95E+00 | 7.89E+03 | 9.95E+03 |
| Smog                  | kg O <sup>3</sup> eq  | 7.88E+02 | 7.83E+02 | 6.12E+01 | 7.77E+00 | 6.76E+02 | 9.18E+02 |
| Acidification         | kg SO <sub>2</sub> eq | 8.73E+01 | 8.67E+01 | 6.64E+00 | 7.60E+00 | 7.49E+01 | 1.02E+02 |
| Eutrophication        | kg N eq               | 5.42E+01 | 5.19E+01 | 1.02E+01 | 1.89E+01 | 4.08E+01 | 8.13E+01 |
| Carcinogenics         | CTUh                  | 1.68E-04 | 8.94E-05 | 3.07E-04 | 1.83E+02 | 4.77E-05 | 7.68E-04 |
| Non carcinogenics     | CTUh                  | 2.19E-03 | 1.86E-03 | 1.24E-03 | 5.68E+01 | 1.03E-03 | 5.22E-03 |
| Respiratory effects   | kg PM2.5 eq           | 8.25E+00 | 8.19E+00 | 8.47E-01 | 1.03E+01 | 6.81E+00 | 1.02E+01 |
| Ecotoxicity           | CTUe                  | 1.21E+05 | 1.05E+05 | 6.46E+04 | 5.35E+01 | 5.49E+04 | 2.89E+05 |
| Fossil fuel depletion | MJ surplus            | 1.28E+04 | 1.27E+04 | 7.37E+02 | 5.77E+00 | 1.14E+04 | 1.44E+04 |
| RFP 2,000 kcal        |                       |          |          |          |          |          |          |
| Impact category       | Unit                  | Mean     | Median   | SD       | CV       | 2.5%     | 97.5%    |
| Ozone depletion       | kg CFC-11 eq          | 1.41E-02 | 1.40E-02 | 1.09E-03 | 7.76E+00 | 1.21E-02 | 1.63E-02 |
| Global warming        | kg CO <sub>2</sub> eq | 9.61E+03 | 9.59E+03 | 4.64E+02 | 4.83E+00 | 8.79E+03 | 1.06E+04 |
| Smog                  | kg O <sup>3</sup> eq  | 6.93E+02 | 6.91E+02 | 4.07E+01 | 5.88E+00 | 6.19E+02 | 7.78E+02 |
| Acidification         | kg SO <sub>2</sub> eq | 7.77E+01 | 7.76E+01 | 4.57E+00 | 5.88E+00 | 6.93E+01 | 8.74E+01 |
| Eutrophication        | kg N eq               | 5.24E+01 | 4.91E+01 | 1.25E+01 | 2.39E+01 | 3.72E+01 | 8.58E+01 |
| Carcinogenics         | CTUh                  | 2.11E-04 | 1.13E-04 | 3.86E-04 | 1.83E+02 | 5.99E-05 | 9.70E-04 |
| Non carcinogenics     | CTUh                  | 2.75E-03 | 2.35E-03 | 1.54E-03 | 5.58E+01 | 1.35E-03 | 6.60E-03 |
| Respiratory effects   | kg PM2.5 eq           | 9.39E+00 | 9.29E+00 | 1.05E+00 | 1.11E+01 | 7.64E+00 | 1.17E+01 |
| Ecotoxicity           | CTUe                  | 1.46E+05 | 1.27E+05 | 7.97E+04 | 5.44E+01 | 6.55E+04 | 3.53E+05 |
| Fossil fuel depletion | MJ surplus            | 1.48E+04 | 1.48E+04 | 7.87E+02 | 5.31E+00 | 1.34E+04 | 1.65E+04 |
| RFP 2,600 kcal        |                       |          |          |          |          |          |          |
| Impact category       | Unit                  | Mean     | Median   | SD       | CV       | 2.5%     | 97.5%    |
| Ozone depletion       | kg CFC-11 eq          | 1.64E-02 | 1.63E-02 | 1.24E-03 | 7.58E+00 | 1.42E-02 | 1.89E-02 |
| Global warming        | kg CO <sub>2</sub> eq | 1.12E+04 | 1.12E+04 | 5.38E+02 | 4.79E+00 | 1.03E+04 | 1.24E+04 |
| Smog                  | kg O <sup>3</sup> eq  | 8.01E+02 | 7.99E+02 | 4.71E+01 | 5.88E+00 | 7.17E+02 | 8.99E+02 |
| Acidification         | kg SO <sub>2</sub> eq | 9.01E+01 | 9.00E+01 | 5.31E+00 | 5.89E+00 | 8.00E+01 | 1.01E+02 |
| Eutrophication        | kg N eq               | 6.18E+01 | 5.80E+01 | 1.49E+01 | 2.41E+01 | 4.36E+01 | 1.03E+02 |
| Carcinogenics         | CTUh                  | 2.51E-04 | 1.34E-04 | 4.61E-04 | 1.84E+02 | 7.03E-05 | 1.15E-03 |
| Non carcinogenics     | CTUh                  | 3.31E-03 | 2.81E-03 | 1.89E-03 | 5.70E+01 | 1.60E-03 | 8.01E-03 |
| Respiratory effects   | kg PM2.5 eq           | 1.11E+01 | 1.10E+01 | 1.24E+00 | 1.12E+01 | 9.02E+00 | 1.38E+01 |
| Ecotoxicity           | CTUe                  | 1.78E+05 | 1.54E+05 | 9.78E+04 | 5.49E+01 | 7.91E+04 | 4.34E+05 |
| Fossil fuel depletion | MJ surplus            | 1.74E+04 | 1.74E+04 | 9.05E+02 | 5.19E+00 | 1.58E+04 | 1.93E+04 |
| RFP 2,000 kcal_Veg    |                       |          |          |          |          |          |          |
| Impact category       | Unit                  | Mean     | Median   | SD       | CV       | 2.5%     | 97.5%    |
| Ozone depletion       | kg CFC-11 eq          | 1.19E-02 | 1.18E-02 | 8.88E-04 | 7.47E+00 | 1.03E-02 | 1.38E-02 |
| Global warming        | kg CO <sub>2</sub> eq | 6.81E+03 | 6.81E+03 | 3.48E+02 | 5.11E+00 | 6.17E+03 | 7.53E+03 |
| Smog                  | kg O <sup>3</sup> eq  | 3.94E+02 | 3.93E+02 | 2.50E+01 | 6.36E+00 | 3.47E+02 | 4.47E+02 |
| Acidification         | kg SO <sub>2</sub> eq | 4.54E+01 | 4.52E+01 | 2.86E+00 | 6.31E+00 | 4.01E+01 | 5.15E+01 |
| Eutrophication        | kg N eq               | 3.72E+01 | 3.48E+01 | 1.08E+01 | 2.91E+01 | 2.48E+01 | 6.56E+01 |
| Carcinogenics         | CTUh                  | 1.80E-04 | 8.82E-05 | 5.95E-04 | 3.30E+02 | 4.60E-05 | 7.39E-04 |
| Non carcinogenics     | CTUh                  | 2.20E-03 | 1.93E-03 | 1.07E-03 | 4.86E+01 | 1.08E-03 | 5.16E-03 |
| Respiratory effects   | kg PM2.5 eq           | 6.88E+00 | 6.77E+00 | 8.30E-01 | 1.21E+01 | 5.47E+00 | 8.79E+00 |
| Ecotoxicity           | CTUe                  | 1.23E+05 | 1.07E+05 | 6.83E+04 | 5.57E+01 | 5.14E+04 | 2.95E+05 |
| Fossil fuel depletion | MJ surplus            | 1.05E+04 | 1.04E+04 | 6.01E+02 | 5.75E+00 | 9.29E+03 | 1.17E+04 |
| RFP 2,600 kcal_Veg    |                       |          |          |          |          |          |          |
| Impact category       | Unit                  | Mean     | Median   | SD       | CV       | 2.5%     | 97.5%    |
| Ozone depletion       | kg CFC-11 eq          | 1.37E-02 | 1.37E-02 | 9.96E-04 | 7.25E+00 | 1.19E-02 | 1.58E-02 |
| Global warming        | kg CO <sub>2</sub> eq | 7.84E+03 | 7.83E+03 | 3.92E+02 | 4.99E+00 | 7.13E+03 | 8.66E+03 |
| Smog                  | kg O <sup>3</sup> eq  | 4.44E+02 | 4.42E+02 | 2.63E+01 | 5.92E+00 | 3.94E+02 | 4.98E+02 |
| Acidification         | kg SO <sub>2</sub> eq | 5.14E+01 | 5.12E+01 | 3.06E+00 | 5.96E+00 | 4.55E+01 | 5.78E+01 |
| Eutrophication        | kg N eq               | 4.45E+01 | 4.17E+01 | 1.29E+01 | 2.89E+01 | 2.98E+01 | 7.84E+01 |
| Carcinogenics         | CTUh                  | 2.12E-04 | 1.04E-04 | 7.04E-04 | 3.31E+02 | 5.38E-05 | 8.91E-04 |
| Non carcinogenics     | CTUh                  | 2.63E-03 | 2.29E-03 | 1.31E-03 | 4.97E+01 | 1.26E-03 | 6.25E-03 |
| Respiratory effects   | kg PM2.5 eq           | 8.07E+00 | 7.94E+00 | 9.79E-01 | 1.21E+01 | 6.45E+00 | 1.02E+01 |
| Ecotoxicity           | CTUe                  | 1.49E+05 | 1.30E+05 | 8.39E+04 | 5.62E+01 | 6.18E+04 | 3.61E+05 |
| Fossil fuel depletion | MJ surplus            | 1.21E+04 | 1.21E+04 | 6.71E+02 | 5.55E+00 | 1.08E+04 | 1.35E+04 |

## References

1. U.S. Department of Commerce Bureau of Economic Analysis, Input-Output Accounts Data Available online: <https://www.bea.gov/industry/input-output-accounts-data>. Available online: <https://www.bea.gov/industry/input-output-accounts-data> (accessed on Nov 12, 2016).
2. U.S. Census Bureau Manufacturing: Summary Series: General Summary: Primary and Secondary Product Value of Shipments by Industry for the U.S.: 2012 Economic Census of the United States Available online: [https://factfinder.census.gov/faces/tableservices/jsf/pages/productview.xhtml?pid=ECN\\_2012\\_US\\_31SG6&prodType=table](https://factfinder.census.gov/faces/tableservices/jsf/pages/productview.xhtml?pid=ECN_2012_US_31SG6&prodType=table) (accessed on Dec 11, 2017).
3. Jayathilakan, K.; Sultana, K.; Radhakrishna, K.; Bawa, A.S. Utilization of byproducts and waste materials from meat, poultry and fish processing industries: A review. *J. Food Sci. Technol.* **2012**, *49*, 278–293.
4. FMI FMI Supermarket Facts, Food Marketing Institute. Arlington, VA, USA. Available online: <http://www.fmi.org/research-resources/supermarket-facts> (accessed on May 12, 2017).
5. U.S. EPA *GreenChill Best Practices Guideline: Commercial Refrigeration Retrofits*; Stratospheric Protection Division, Washington D.C., USA, 2011;
6. Devotta, S.; Sicars, S.; Agarwal, R.; Anderson, J.; Bivens, D.; Colbourne, D.; Hundy, G.; König, H.; Lundqvist, P.; McInerney, E.; et al. *IPCC/TEAP Special Report on Safeguarding the Ozone Layer and the Global Climate System. Chapter 4: Refrigeration. pp 225-267. Cambridge University Press; Cambridge; United Kingdom and New York; NY; USA; 2005*;
7. Robertson, G.L. *Food Packaging: Principles and Practice, 3rd Edition*; Third Edit.; CRC Press: Boca Raton, Florida, 2012; ISBN 978-1439862414.
8. U.S. Packaging & Wrapping LLC A beginner's guide to meat packaging Available online: <http://www.uspackagingandwrapping.com/blog/A-Beginner-s-Guide-to-Meat-Packaging.html>.
9. UN FAO Egg packaging, transport and storage Available online: <http://www.fao.org/docrep/005/Y4628E/y4628e05.htm> (accessed on May 8, 2017).
